# Supplementary material
Source: PubMed Central journal article supplement (PMC5210236)
Supplement: 2016.149559.GEYER_SUPPL.pdf [file 2016.149559.GEYER_SUPPL.pdf]

## Associations between gender, disease features and symptom burden in patients with myeloproliferative neoplasms: an analysis by the MPN QOL International Working Group

Holly L. Geyer,<sup>1</sup> Heidi Kosiorek,<sup>2</sup> Amylou C. Dueck,<sup>2</sup> Robyn Scherber,<sup>3</sup> Stefanie Slot,<sup>4</sup> Sonja Zweegman,<sup>4</sup> Peter AW te Boekhorst,<sup>5</sup> Zhenya Senyak,<sup>6</sup> Harry C. Schouten,<sup>7</sup> Federico Sackmann,<sup>8</sup> Ana Kerguelen Fuentes,<sup>9</sup> Dolores Hernández-Maraver,<sup>9</sup> Heike L. Pahl,<sup>10</sup> Martin Griesshammer,<sup>11</sup> Frank Stegelmann,<sup>12</sup> Konstanze Döhner,<sup>12</sup> Thomas Lehmann,<sup>13</sup> Karin Bonatz,<sup>14</sup> Andreas Reiter,<sup>14</sup> Françoise Boyer,<sup>15</sup> Gabriel Etienne,<sup>16</sup> Jean-Christophe Ianotto,<sup>17</sup> Dana Ranta,<sup>18</sup> Lydia Roy,<sup>19</sup> Jean-Yves Cahn,<sup>20</sup> Claire N. Harrison,<sup>21</sup> Deepti Radia,<sup>21</sup> Pablo Muxi,<sup>22</sup> Norman Maldonado,<sup>23</sup> Carlos Besses,<sup>24</sup> Francisco Cervantes,<sup>25</sup> Peter L. Johansson,<sup>26</sup> Tiziano Barbui,<sup>27</sup> Giovanni Barosi,<sup>28</sup> Alessandro M. Vannucchi,<sup>29</sup> Chiara Paoli,<sup>29</sup> Francesco Passamonti,<sup>30</sup> Bjorn Andreasson,<sup>26</sup> Maria L Ferrari,<sup>31</sup> Alessandro Rambaldi,<sup>27</sup> Jan Samuelsson,<sup>32</sup> Keith Cannon,<sup>1</sup> Gunnar Birgegård,<sup>33</sup> Zhijian Xiao,<sup>34</sup> Zefeng Xu,<sup>34</sup> Yue Zhang,<sup>34</sup> Xiujuan Sun,<sup>34</sup> Junqing Xu,<sup>34</sup> Jean-Jacques Kiladjian,<sup>35</sup> Peihong Zhang,<sup>36</sup> Robert Peter Gale<sup>37</sup> and Ruben A. Mesa<sup>38</sup>

<sup>1</sup>Department of Internal Medicine, Mayo Clinic, Scottsdale, AZ, USA; <sup>2</sup>Section of Biostatistics, Mayo Clinic, Scottsdale, AZ, USA; <sup>3</sup>Oregon Health Sciences University, Portland, OR, USA; <sup>4</sup>Department of Hematology, VU University Medical Center, Amsterdam, the Netherlands; <sup>5</sup>Department of Hematology, Erasmus MC, Rotterdam, the Netherlands; <sup>6</sup>MPN Forum, Ashville, NC, USA; <sup>7</sup>Department of Hematology, MUMC, Maastricht, the Netherlands; <sup>8</sup>Fundaleu, Buenos Aires, Argentina; <sup>9</sup>Department of Haematology, University Hospital La Paz, Madrid, Spain; <sup>10</sup>Department of Molecular Hematology, University Hospital Freiburg, Germany; <sup>11</sup>Johannes Wesling Klinikum, Minden, Germany; <sup>12</sup>Department of Internal Medicine III, University Hospital of Ulm, Germany; <sup>13</sup>Hematology Department, University Hospital, Basel, Switzerland; <sup>14</sup>Medizinische Klinik, Universitätsmedizin, Mannheim, Germany; <sup>15</sup>Centre Hospitalier Universitaire, Angers, France; <sup>16</sup>Institut Bergonie, Bordeaux, France; <sup>17</sup>Centre Hospitalier Universitaire, Brest, France; <sup>18</sup>Hospitalier Universitaire, Nancy, France; <sup>19</sup>Centre Hospitalier Universitaire, Poitiers, France; <sup>20</sup>Centre Hospitalier Universitaire, Grenoble, France; <sup>21</sup>Department of Haematology, Guy's and St. Thomas NHS Foundation Trust, London, UK; <sup>22</sup>Unidadde Hematología, Hospital Británico, Montevideo, Uruguay; <sup>23</sup>University of Puerto Rico School of Medicine, San Juan, Puerto Rico; <sup>24</sup>Hematology Department, Hospital del Mar, Barcelona, Spain; <sup>25</sup>Hematology Department, Hospital Clínic, IDIBAPS, University of Barcelona, Spain; <sup>26</sup>Internal Medicine, NU Hospital Organization, Uddevalla, Sweden; <sup>27</sup>Research Foundation (FROM), Hospital Papa Giovanni XXIII, Bergamo, Italy; <sup>28</sup>Laboratory of Clinical Epidemiology, IRCCS Policlinico S. Matteo Foundation, Pavia, Italy; <sup>29</sup>Center for Research and Innovation of Myeloproliferative Neoplasms, University of Florence, Italy; <sup>30</sup>Ematologia, Dipartimento di Medicina Clinica e Sperimentale, University of Insubria, Varese, Italy; <sup>31</sup>Biol. Sci., Ospedali Riuniti di Bergamo, Italy; <sup>32</sup>Department of Internal Medicine, Stockholm South Hospital, Sweden; <sup>33</sup>Department of Hematology, University Hospital, Uppsala, Sweden; <sup>34</sup>MDS and MPN Center, Institute of Hematology and Blood Diseases Hospital, Chinese Academy of Medical Sciences and Peking Union Medical College, Tianjin, China; <sup>35</sup>Clinical Investigation Center, Hospital Saint-Louis, Paris, France; <sup>36</sup>Department of Pathology, Institute of Hematology and Blood Diseases Hospital, Chinese Academy of Medical Sciences & Peking Union Medical College, Tianjin, China; <sup>37</sup>Imperial College, London, UK and <sup>38</sup>Department of Hematology and Oncology, Mayo Clinic, Scottsdale, AZ, USA

©2017 Ferrata Storti Foundation. This is an open-access paper. doi:10.3324/haematol.2016.149559

Received: May 19, 2016.

Accepted: August 12, 2016.

Pre-published: August 18, 2016.

Correspondence: mesa.ruben@mayo.edu or geyer.holly@mayo.edu

## **Appendix 1: MPN-SAF PRO Development and Validation**

The MPN-SAF included existing questions from the Myelofibrosis Symptom Assessment Form (MF-SAF; fatigue, early satiety, abdominal pain, abdominal discomfort, inactivity, cough, night sweats, pruritus, bone pain, fever, weight loss and quality of life) and was expanded to include 'problems with concentration', 'difficulty sleeping', 'numbness/tingling', 'depression or sad mood' and 'problems with sexual desire or function'. All questions were scored on a scale from 0 (as good as it can be/absent) to 10 (as bad as it can be/worst-imaginable). The survey was drafted in English format and translated into other languages via an established Patient Reported Outcome translation method. Translation for each language involved three independent survey translations created by translators fluid in both English and the respective language requiring translation. A fourth translator then compares the three translator manuscripts to develop a consensus translation.

Upon completion of the survey, patients were recruited from academic, government-funded and private practice international medical centers. Patients were requested to self-complete the MPN-SAF during an office visit. Patients were also provided the opportunities to include additional symptoms omitted from the survey via open-ended questions.

Physicians who were blinded to patient responses were required to rank patient symptoms on the same 0-10 scale as well as document patient disease status including laboratory data, treatment history and prognostic scores. Anova F tests or 2-sample t tests were used to assess continuous variables whereas  $\chi^2$  tests were used to compare categorical variables. The relationships between variables was assessed using Pearson correlations. Patient scores between language groups were adjusted by disease type using general linear models and intraclass correlation coefficient (ICC) was analyzed on the basis of a 2-way ANOVA model.
